# Supplementary material
Source: Springer Nature journal article supplement (https://www.springermedizin.de/resource/supplementary/12916_2011_436_MOESM7_ESM.pdf/9599950)

**DYN network**  
 $1/\sigma = 2$  days;  $1/\nu = 4$  days;  $\beta = 15 \cdot 10^{-5} \text{ s}^{-1}$

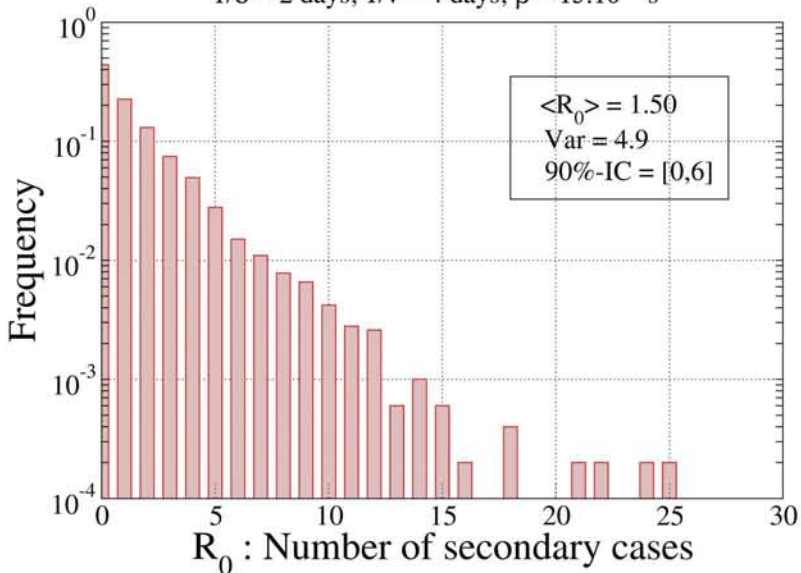

**HET network**  
 $1/\sigma = 2$  days;  $1/\nu = 4$  days;  $\beta = 15 \cdot 10^{-5} \text{ s}^{-1}$

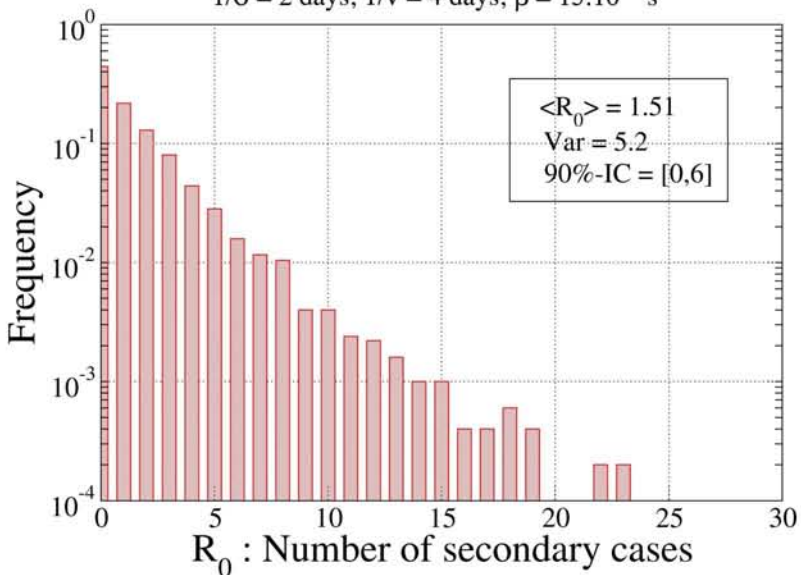

**HOM network**  
 $1/\sigma = 2$  days;  $1/\nu = 4$  days;  $\beta = 15 \cdot 10^{-5} \text{ s}^{-1}$

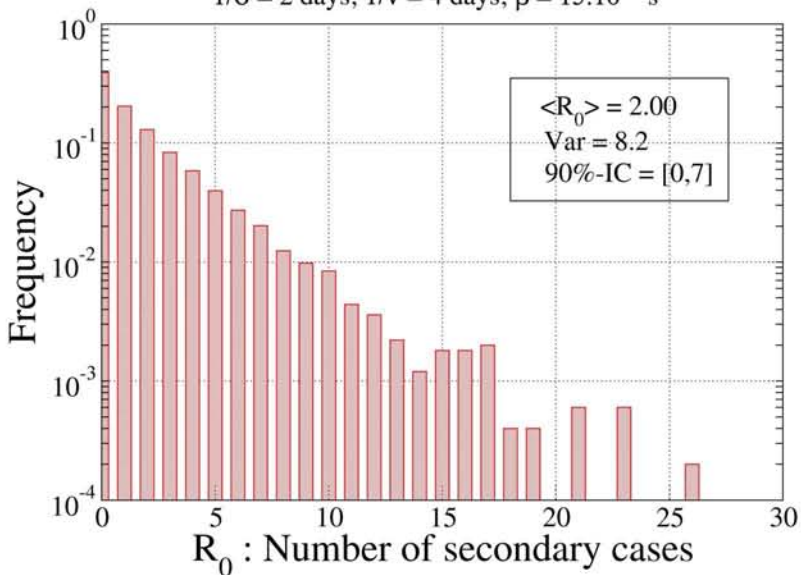

Supplement: MOESM7 [file 9599950]
